# Supplementary material for: Rare observation of ‘aggregation induced emission’ in cyclometalated platinum(ii) complexes and their biological activities
Source: Royal Society of Chemistry journal article supplement (doi:10.1039/c4ra06623e), 2014-01-01
Supplement: c4ra06623e1.pdf [file c4ra06623e1.pdf]

## Supporting documents

### Rare Observation of ‘Aggregation Induced Emission’ in Cyclometalated Platinum(II) Complexes and their Biological Activities

Sheik Saleem Pasha<sup>a</sup>, Parvej Alam<sup>a</sup>, Subhra Dash<sup>b</sup>, Gurpreet Kaur<sup>c</sup>, Debashree Banerjee<sup>d</sup>, Rajdeep Chowdhury<sup>b</sup>, Nigam Rath<sup>e</sup>, Angshuman Roy Choudhury<sup>c</sup>, Inamur Rahaman Laskar<sup>a\*</sup>

<sup>a</sup>Department of Chemistry, Birla Institute of Technology and Science, Pilani Campus, Pilani, Rajasthan, India; [ir\\_laskar@bits-pilani.ac.in](mailto:ir_laskar@bits-pilani.ac.in); <sup>b</sup>Department of Biology, Birla Institute of Technology and Science, Pilani Campus, Pilani, Rajasthan, India; [rajdeep.chowdhury@gmail.com](mailto:rajdeep.chowdhury@gmail.com); <sup>c</sup>Department of Biological Sciences, Birla Institute of Technology and Sciences, Jawahar Nagar, Shameerpet Mandal, Hyderabad, Andhrapradesh, 50078, India; [banerjee\\_debi@yahoo.com](mailto:banerjee_debi@yahoo.com); <sup>d</sup>Department of Chemistry and Biochemistry and Center for Nanoscience, University of Missouri- St. Louis, St. Louis, MO 63121USA; [rathn@umsl.edu](mailto:rathn@umsl.edu); <sup>e</sup> Department of Chemical Sciences, Indian Institute of Science Education and Research (IISER), Mohali, Sector 81, S. A. S. Nagar, Manauli PO, Mohali, Punjab 140306, India ; [angshurc@iisermohali.ac.in](mailto:angshurc@iisermohali.ac.in)

## Experimental

**Materials:** Potassium tetra chloro palatinate(II), 1,2-bis(diphenylphosphino)ethane, *cis*-1,2

Bis(diphenylphosphino)ethylene, 2-phenylpyridine, 2-ethoxyethanol were purchased from Sigma Aldrich Chemical Company Ltd. The other used solvents were procured from Merck.

**Characterization:** <sup>1</sup>H NMR, <sup>13</sup>C NMR and <sup>31</sup>P NMR spectra were recorded in a 400 MHz Bruker NMR spectroscope. UV-Vis absorption spectra were recorded in a Simadzu Spectrophotometer (model UV-1800 and 2550). Steady state photoluminescence (PL) spectra was recorded on Horiba Jobin Yvon Spectrofluorometer (FluoroMax-4). The solid state quantum yield of the thin film sample was measured using a calibrated integrating sphere in a Gemini Spectrophotometer (model Gemini 180).

## Syntheses and characterizations

### Synthesis of complex 1

**Complex-1:**  $K_2PtCl_4$  (0.30 g, 7.2 mmol) and 2-phenyl pyridine (0.280 g, 18.1 mmol) were dissolved in 4 mL of water and kept in a microwave vial for 10 min under microwave condition at 100°C. After 10 min green color precipitate was obtained and it was separated from water, dry under vacuum oven for 15 min. The crude product was recrystallized by ethanol giving green color solid product, Yield, (0.360 g, 92%).

### General syntheses for complex 2 and 3

To a stirred solution of complex 1 (1 equivalent) in DCM (6 mL), chelate phosphine ligands for complex 1, 1,2-bis(diphenylphosphino)ethane and for complex 2, cis-1,2-Bis(diphenylphosphino)ethylene (1 equivalent) was added and the reaction mixture was stirred for 1 minute, the crude product was purified by column chromatography using 60-120 silica mesh giving pure products.

Complex 2, green solid, 94% yield and complex 3 green solid, 85% yield

**Fabrication of thin-film of 2a and 2b on substrate for PL measurement:** The  $10^{-3}$  M solution of Complex-1, Complex-2 and complex-3 (in DCM) were prepared. Two drops of the solution were placed on thin glass substrate ( $2 \times 2 \text{ cm}^2$ ) and the solvent was allowed to evaporate slowly.

### Preparation of solution of THF/H<sub>2</sub>O and DCM / hexane of 1, 2 and 3 for PL measurement:

$10^{-5}$  M stock solution of **1** was prepared in THF. Six 5 ml glass tubes were taken and labeled them as 0%, 30%, 50%, 70%, 80% and 90%. 0.5 mL of stock solution was added to each of the flask. Then, volume was filled to 5 ml through addition of 0 ml, 1.5 ml, 2.5 ml, 3.5 ml, 4 ml and 4.5 ml water to 0%, 30%, 50%, 70%, 80% and 90%, labeled flasks, respectively. For **2** and **3** DCM/ Hexane was used in place of THF/ water.

Single crystal X-ray diffraction data were collected on Bruker AXS Kappa Apex II diffractometer equipped with Oxford Cryosystem 700Plus liquid nitrogen based cooling device. The data set was recorded at 100K using  $\varphi$  and  $\omega$  scans such that the data is completed up to 70 degrees two theta. Data reduction and standard processing were done using APEX II<sup>1</sup> suite available from Bruker AXS. The crystal structure was solved using direct methods (SHELXS97)<sup>2</sup> available in the Olex2<sup>3</sup> suite and the structure was refined by full matrix least squares refinement process using SHELXL97.<sup>2</sup> Geometric calculations were carried out using PARST97<sup>4</sup> and PLATON97.<sup>5</sup>

### Quantum Chemical Calculation using Density Functional Theory (DFT):

The crystal structure of the Platinum complex is being geometry optimized at ground state level using Density Functional Theory (DFT). B3LYP hybrid functional was used in DFT. Double-Zeta basis set (LANL2DZ) and effective core potential was approximated for Platinum atom. The four atoms coordinated to Platinum and the counter-ion chloride were treated separately from the remaining atoms in the complex. The basis set applied on Chlorine atom, 6-311++G (3df,4pd), contains additional diffusion function to represent its anionic nature. Two phosphorous atoms, one nitrogen atom and one carbon atom coordinated to Platinum were being assigned 6-

31G\*\* basis set. Remaining carbon and hydrogen atoms were assigned with 6-31G\* and 3-21G basis sets, respectively. Time-dependent DFT (TD-DFT) calculations were performed on the lowest singlet ground state to probe the absorption and emission properties, using the same functional and basis sets. As the experiments were recorded in dichloromethane (CH<sub>2</sub>Cl<sub>2</sub>) (DCM) solvent, all the computations were performed in DCM solution ( $\epsilon=8.93$ ) using polarizable continuum model. Ten lowest singlet and triplet roots of the non-Hermitian eigenvalue equations were obtained to determine the vertical excitation energies. Oscillator strengths were deduced from the dipole transition matrix elements for singlet states only. All the calculations were performed using GAMESS-US software. Canonical Molecular Orbital analysis (CMO) has been performed to analyze the composition and bonding nature of molecular orbitals (MO), using NBO 5.0 software. CMO analysis gives effective information on i) bonding characters of MO, like HOMO – x, LUMO + y etc. and ii) the energies of individual MOs. The partial charge transfer (CT) has been characterized for HOMO – x to LUMO + y transition (Equation 1).

$$CT(M)=[\%(M)HOMO-x]-[\%(M)LUMO+y] \dots \text{Equation 1}$$

In Equation 1, “%(M)HOMO - x” and “%(M)LUMO + y” are percentage of metal character obtained from CMO analysis. When the contributions to an excited state comes from the multiple single-electron excitations, the metal CT character is described by the Equation 2

$$CT_i(M) = \sum [C_i(i-j)]^2 ((M)_i - (M)_j) \dots \text{Equation 2},$$

where  $C_i(i-j)$  are co-efficients expressed as the excitation amplitudes corresponding to transitions between  $i$  to  $j$  states.

### **Cytotoxicity and cell imaging study**

Hep3B cells (procured from National Centre for Cell Science-NCCS, Pune) were cultured in minimum essential media (MEM) (Hi media, #41500-067) containing 10% FBS (Invitrogen, #26140-079) and 1% penicillin and streptomycin mixture (Invitrogen, #10378-016).

The *in-vitro* cytotoxicity was determined through several assays. Briefly, Hep3B cells growing in log phase were seeded at a density of 4000 cells per well in 96 well plates and incubated overnight at 5% CO<sub>2</sub> and 37°C. The cells were treated with the Pt complex at concentrations of 0.5 $\mu$ M, 1 $\mu$ M, 2 $\mu$ M, 5 $\mu$ M, and 10 $\mu$ M dissolved with DMSO (Sigma, # D2438) for 24 hours with respective control where no drug was added. Following drug treatment, MTT/PBS (MTT: Sigma, #M5655) (Stock concentration 5mg/ml) (PBS: Invitrogen, #21300-025) 20ul was added and incubated for 4 hours post which formazan crystals were solubilized using DMSO and readings were obtained at 495nm with a differential filter at 630nm using an enzyme-linked immune-sorbent

assay (ELISA) micro-plate reader (model no: Start-fax 2100). Percentage of viable cells was calculated using formula:

$$\text{Viability (\%)} = (\text{mean absorbance value of drug treated cells}) / (\text{mean absorbance value of control}) * 100$$

The in-vitro cytotoxicity was also validated through WST-1 assay, a ready-to-use colorimetric assay for the non-radioactive quantification of cytotoxicity. Briefly, Hep3B cells were seeded at a density of 4000 cells per well in a 96 well plate and incubated for 24 and 48 hours at 5% CO<sub>2</sub>, and 37°C. The cells were treated with the Pt complex at concentrations of 0.5µM, 2µM, 5µM, 10µM, 15µM. Following drug treatment, WST1 reagent (Roche, #11644807001) was added (10µl in 100µl media) in all the wells and incubated for 4 hours. The absorbance was measured at 450nm using the ELISA micro-plate reader. Percentage of viable cells was calculated using the same formula as MTT assay. Furthermore, in-vitro cytotoxicity was also assayed through Trypan Blue staining. Hep3B cells were seeded at a density of 1\*10<sup>6</sup> cells in 25cm<sup>2</sup> culture flask and incubated for 30 hours. Cells were then trypsinized, 20µl of cell suspension was mixed with 2µl of trypan blue dye (Bio-Rad, cat no-#145-0013) and added in a dual chamber cell counter slide (Bio-Rad, cat no- #145-0011). Post which viability was assayed with an automated cell counter (Bio-Rad).

For bio-imaging experiment, cells were cultured at a density of 2\*10<sup>4</sup> per cover slip and incubated at 5% CO<sub>2</sub> and 37°C for 24 hours. Following incubation, platinum compound at a concentration of 10µM was added and cells were kept in the incubator for another 1 hour. Cells were then mounted with glycerol on glass slides and observed under a fluorescence microscope (OLYMPUS, U-25ND25). A representative figure for both bright field and fluorescence image (100X) is provided in the text. Scale bar represents 5µm.

arc-28Dec-2012.12.fid  
 PT51a Proton test  
 PROTON CDCl3 /opt/topspin nmrsu 58

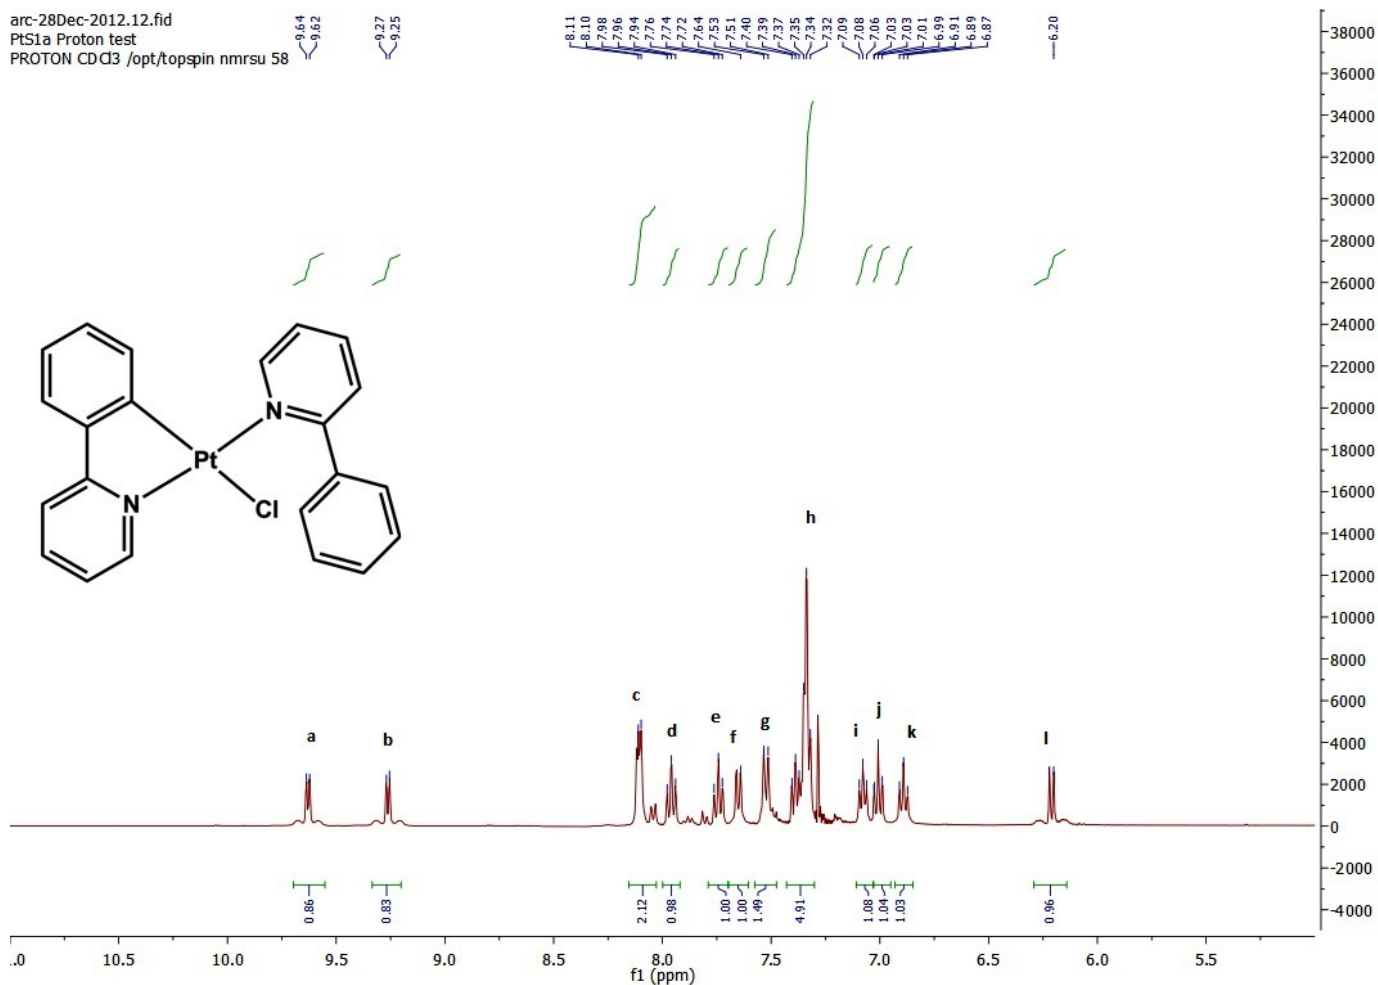

**Fig.S1**  $^1\text{H}$  NMR spectra of **1**, [ $^1\text{H}$  NMR (400 MHz, Chloroform-*d*) a= $\delta$  9.63 (d,  $J$  = 6.0 Hz, 1H), b= $\delta$  9.26 (d,  $J$  = 5.7 Hz, 1H), c= $\delta$  8.10 (d,  $J$  = 5.2 Hz, 2H), d= $\delta$  7.96 (t,  $J$  = 7.8 Hz, 1H), e= $\delta$  7.74 (t,  $J$  = 7.6 Hz, 1H), f= $\delta$  7.64 (s, 1H), g= $\delta$  7.52 (d,  $J$  = 7.8 Hz, 2H), h= $\delta$  7.36 (dt,  $J$  = 20.8, 6.9 Hz, 4H), i= $\delta$  7.08 (t,  $J$  = 6.7 Hz, 1H), 7.03 – 6.97 (m, 1H), j= $\delta$  6.89 (t,  $J$  = 7.4 Hz, 1H), k=6.22 (t, 1H), l= $\delta$  6.20 (d, 1H).]

arc-28Dec-2012.14.fid  
PtS1a Carbon test  
C13CPD CDCl3 /opt/topspin nmr5u 58

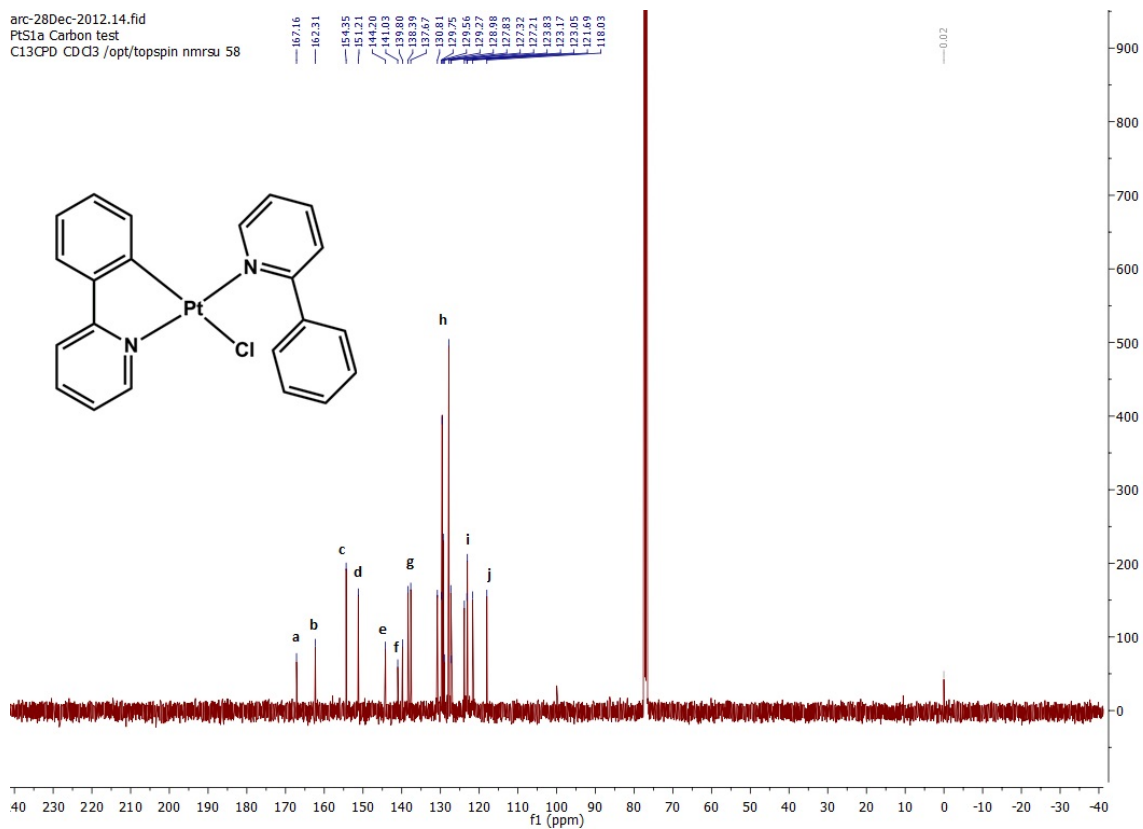

**Fig. S2**  $^{13}\text{C}$  NMR spectra of **1**, [ $^{13}\text{C}$  NMR (101 MHz,  $\text{CDCl}_3$ ) a= $\delta$  167.16, b= $\delta$  162.31, c= $\delta$  154.35, d= $\delta$  151.21, e= $\delta$  144.20, f= $\delta$  141.03, g= $\delta$  139.80, 138.39, 137.67, h= $\delta$  130.81, 129.75, 129.56, 129.27, 128.98, 127.83, 127.32, 127.21, i= $\delta$  123.83, 123.17, 123.05, 121.69, j= $\delta$  118.03].



DT communication  
PT PP  
Cl3CPD CDCl3 /opt/topspin nmrsu 60

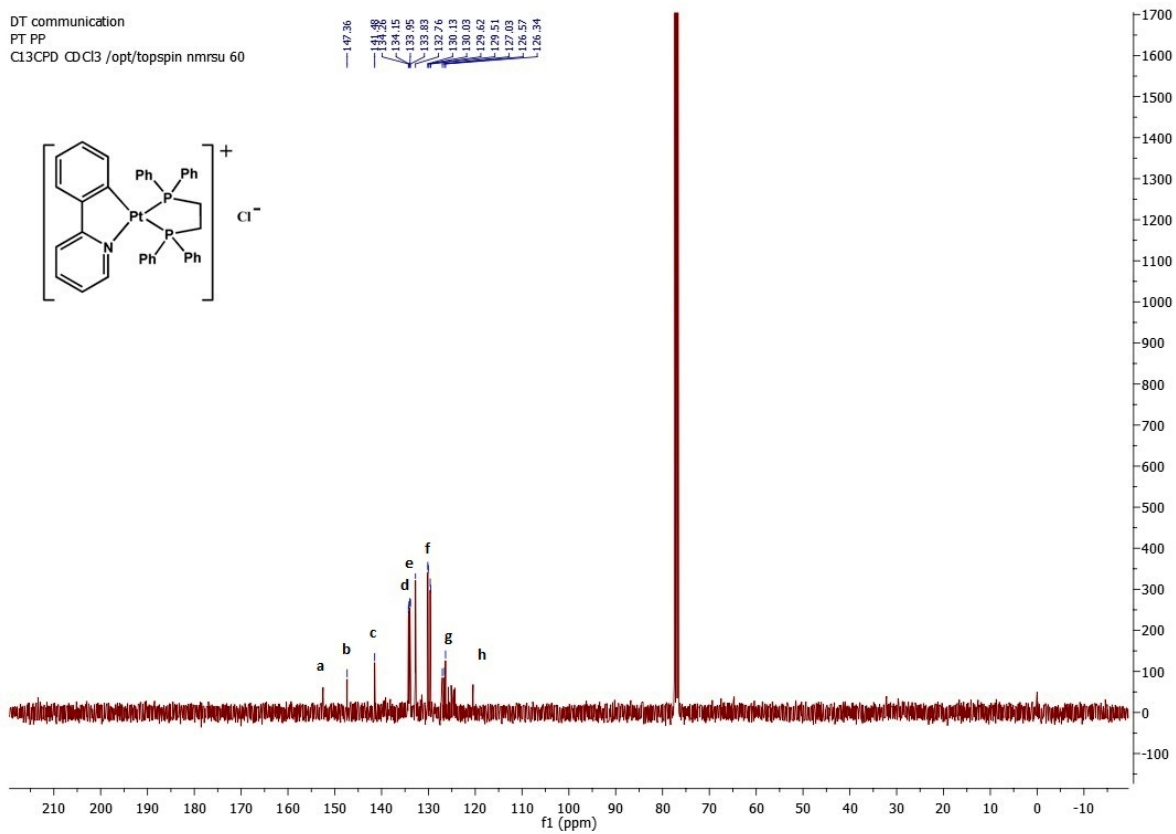

**Fig.S4**  $^{13}\text{C}$  NMR of complex 2, [ $^{13}\text{C}$  NMR (101 MHz,  $\text{CDCl}_3$ ) a= $\delta$  152.48, b=  $\delta$  147.34, c=  $\delta$  141.47, d=  $\delta$  134.25, 134.14, e=  $\delta$  133.94, 133.82, 132.75, 132.73, f=  $\delta$  130.12, 130.02, 129.61, 129.49, g=  $\delta$  127.02, 126.56, 126.33, 125.74, 125.13, h=  $\delta$  120.45].



PT ETHYLENE PP  
Cl3CPD CDCl3 /opt/topspin nmsu 35

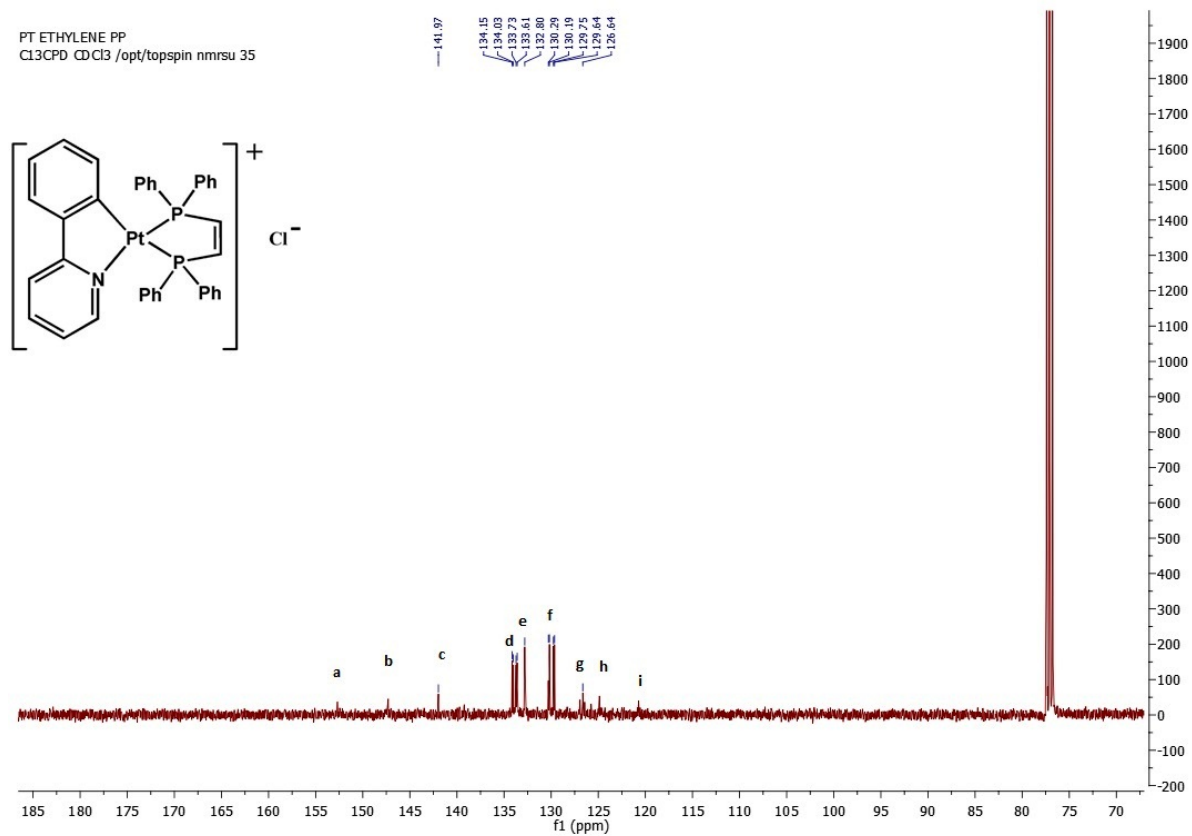

**Fig. S5** <sup>13</sup>C NMR spectra of **3** [<sup>13</sup>C NMR (101 MHz, CDCl<sub>3</sub>) a=δ 152.76, b= δ 147.30, c= δ 141.97, d= δ 134.15, 134.03, e= δ 133.73, 133.61, 132.79, f= δ 130.29, 130.19, 129.76, 129.64, g= δ 126.94, 126.64, 126.45, h= δ 124.89, i= δ 120.73].

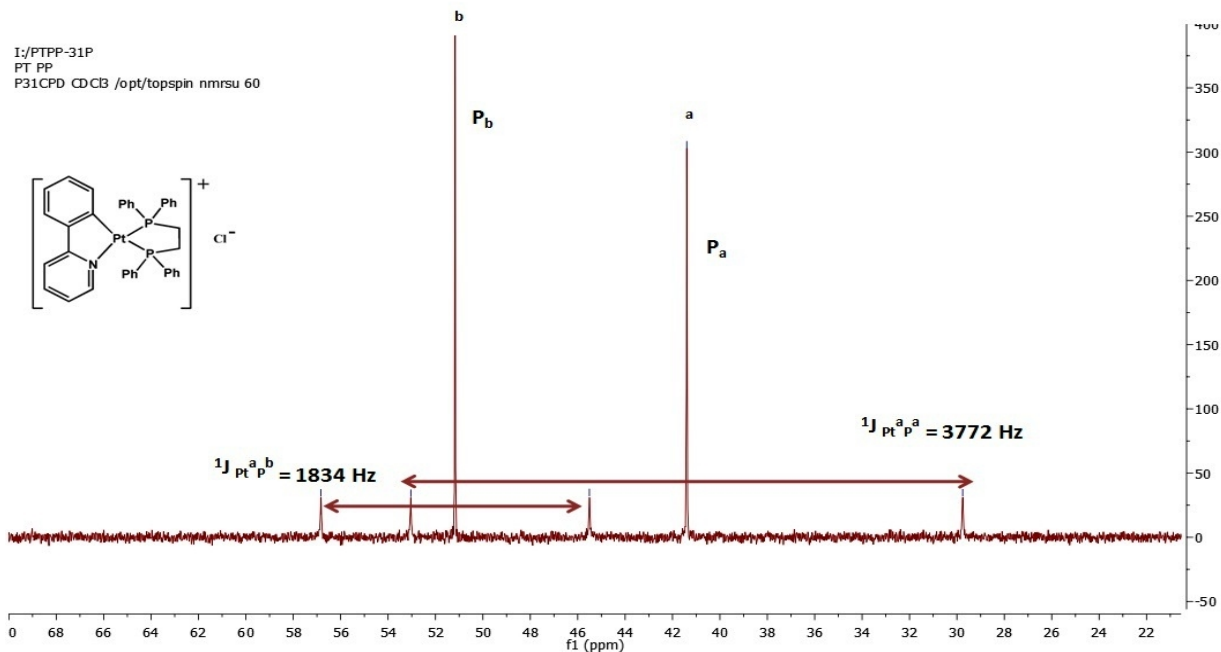

**Fig. S6**  $^{31}\text{P}$  NMR spectra of **2** [ $^{31}\text{P}$  NMR (162 MHz,  $\text{CDCl}_3$ ) a=  $\delta$  41.01 , b=  $\delta$  51.48].

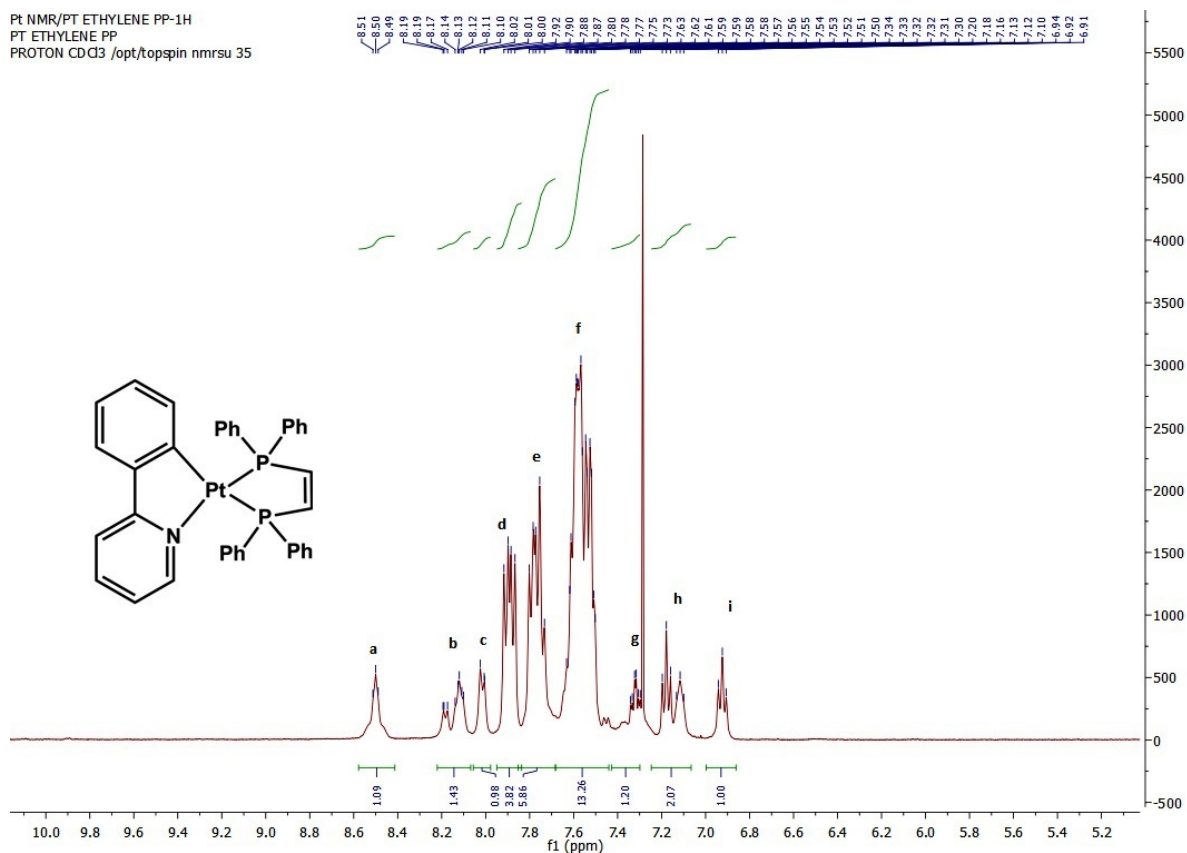

**Fig. S7**  $^1\text{H}$  NMR spectra of **3** [ $^1\text{H}$  NMR (400 MHz, Chloroform-*d*) a= $\delta$  8.50 (t,  $J$  = 4.8 Hz, 1H), b=8.22 – 8.05 (m, 1H), c=8.01 (d,  $J$  = 7.2 Hz, 1H), d=7.89 (dd,  $J$  = 12.7, 7.4 Hz, 4H), e=7.77 (dt,  $J$  = 16.1, 7.9 Hz, 6H), f=7.56

(ddt,  $J = 17.5, 9.7, 7.1$  Hz, 13H),  $g=7.32$  (td,  $J = 7.2, 3.0$  Hz, 1H),  $h=7.15$  (dt,  $J = 24.1, 7.0$  Hz, 2H),  $i=6.92$  (t,  $J = 7.3$  Hz, 1H)].

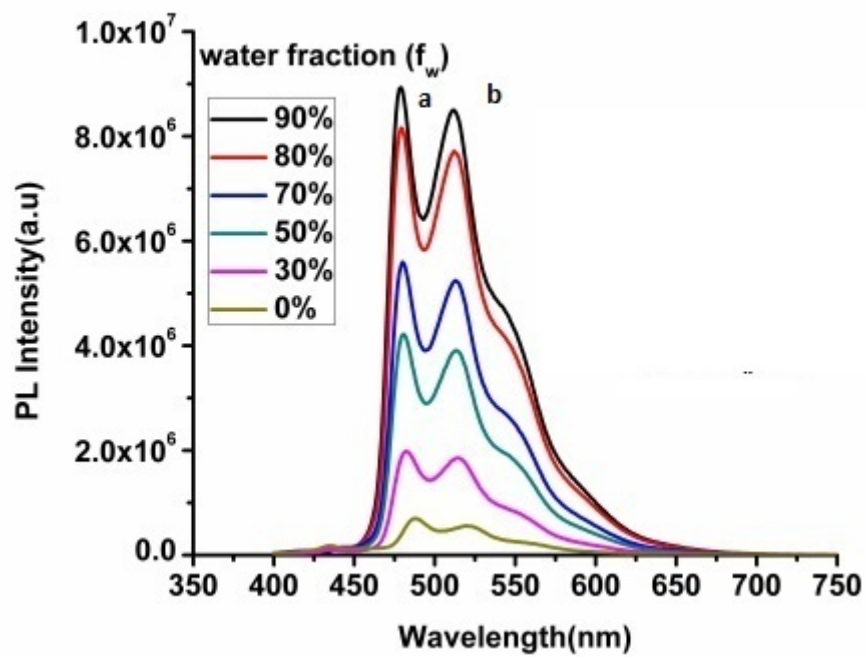

a

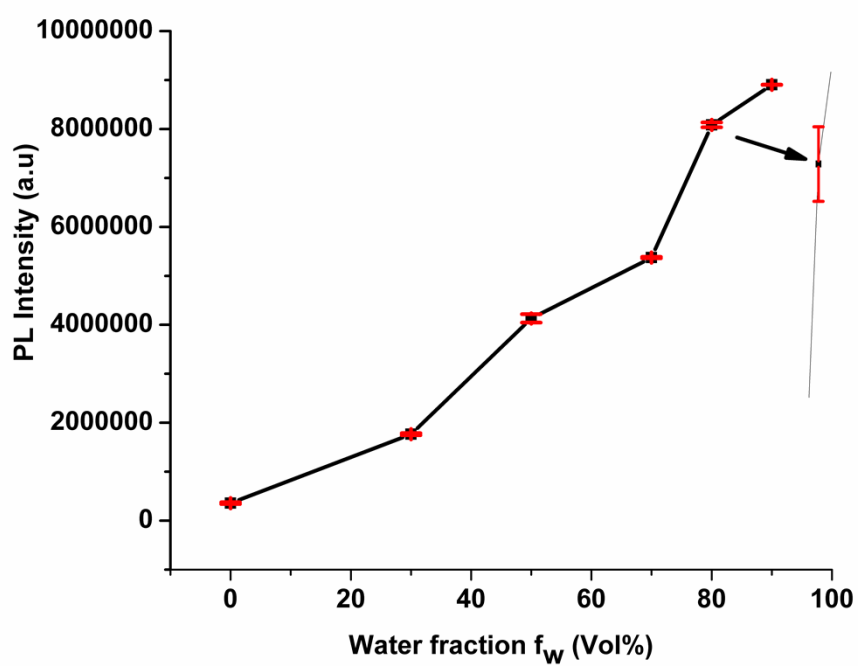

b

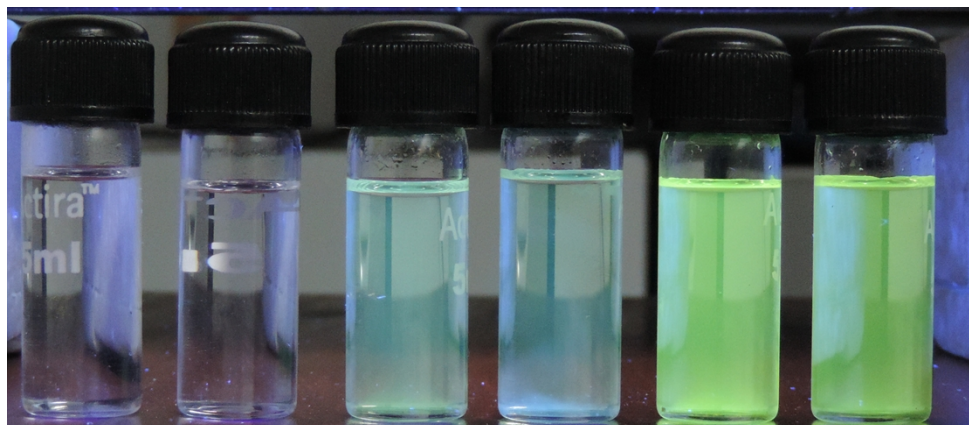

c

**Fig S8.** (a, b and c) PL spectra of 1 in THF/water mixed solvents with different  $f_w$  with excitation at 385 nm, (Insets depict the changes of PL peak intensity with different  $f_h$ ) ( $\lambda_{\max}$  a=487 and b=521 nm); the error bar representation of PL intensity and Luminescent images of 1 (radiated with an ultraviolet light at 365 nm) in water-THF mixed solvents with the concentration kept at  $2 \times 10^{-5}$  M.

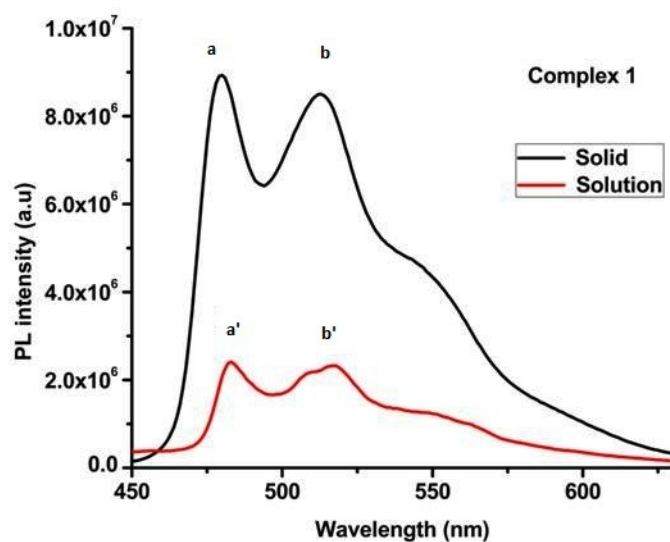

**Fig S9.** PL emission spectra of complex 1 in THF ( $a'$ =479 nm and  $b'$ =512 nm) and in solid state ( $a$  = 480 nm and  $b$  = 513 nm respectively)

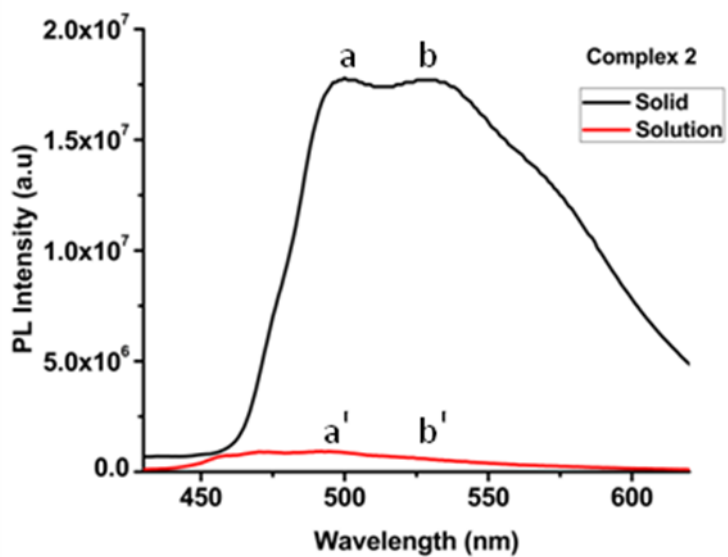

**Fig S10.** PL emission spectra of complex 2 in DCM ( $a'$  = 490 nm and  $b'$  = 535 nm) and in solid state ( $a$  = 490 nm and  $b$  = 535 nm) respectively.

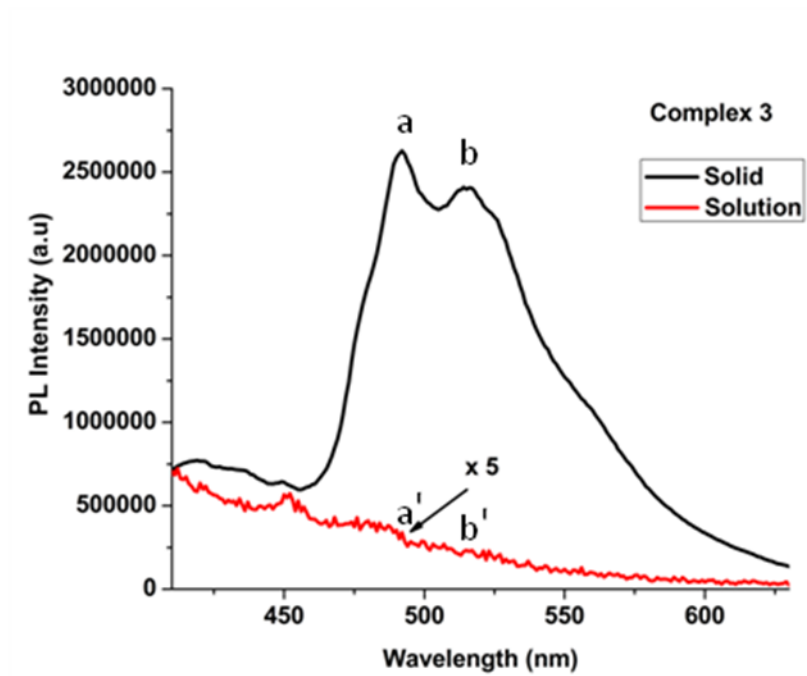

**Fig S11.** PL emission spectra of complex **3** in DCM ( $a' = 490$  nm and  $b' = 517$  nm) and in solid state ( $a = 490$  nm and  $b = 517$  nm) respectively.

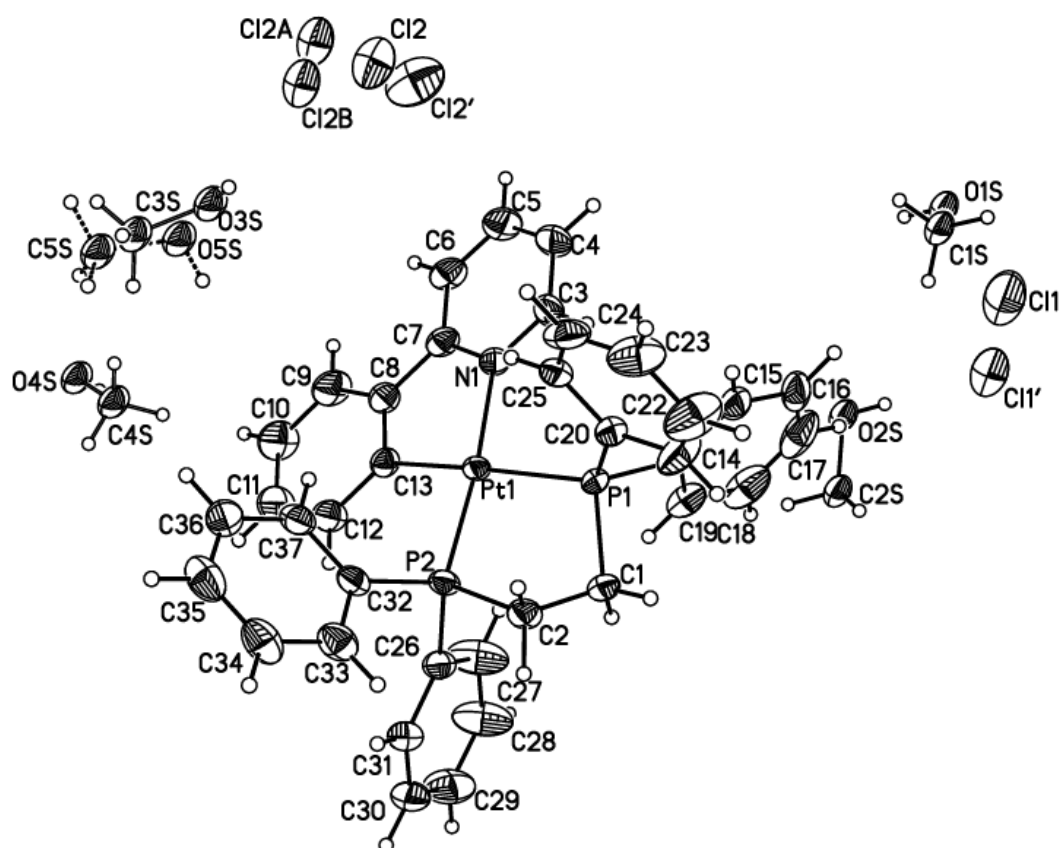

**Fig. S12** ORTEP diagram for **2** showing the square planer geometry at the Pt site (The crystal containing solvents, a 7 half occupancy MeOH and 2 half occupancy water (total 3.5 molecules MeOH and 1.0 molecule water per Pt)

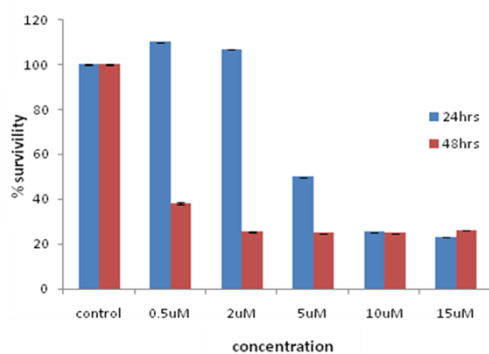

**Fig.S13** The time kinetic study of complex **2** as assayed by WST-1 assay.

**Table S1. Photophysical property for the complexes 1, 2 and 3**

| Complex  | UV-Vis absorption <sup>[a]</sup><br>nm, ( $\epsilon \times 10^4$ , $M^{-1}cm^{-1}$ ) | PL solution<br>( $\lambda_{max}$ ) (nm) <sup>[b]</sup> | PL solid state<br>( $\lambda_{max}$ ) (nm) | $\phi^{[c]}$ solution | $\phi^{[d]}$ solid |
|----------|--------------------------------------------------------------------------------------|--------------------------------------------------------|--------------------------------------------|-----------------------|--------------------|
| <b>1</b> | 290 (8.2), 348 (1.80),<br>384 (0.50)                                                 | 479, 511                                               | 480, 512                                   | -                     | -                  |
| <b>2</b> | 269 (9.2), 327 (2.05),<br>360 (0.77)                                                 | 470, 492                                               | 500, 530                                   | 0.001                 | 0.096              |
| <b>3</b> | 267 (8.40), 330 (1.60),<br>371 ( <b>0.44</b> )                                       | <b>480, 510</b>                                        | <b>490, 517</b>                            | <b>0.0009</b>         | <b>0.106</b>       |

<sup>[a]</sup> Spectra were recorded in degassed dichloromethane (DCM) at room temperature with  $10^{-5}$  [M], <sup>[b]</sup> Recorded in DCM; <sup>[c]</sup> Solution QE ( $\phi_{sol}$ ) has been measured with respect to quinine sulfate (in 0.1M H<sub>2</sub>SO<sub>4</sub>, QE=0.55, excitation, 480nm); <sup>[d]</sup> Solid state phosphorescence QE ( $\phi_{solid}$ ) has been recorded using integrating sphere.

**Table S2. Crystal data and structure refinement for 2.**

|                   |                                                                     |
|-------------------|---------------------------------------------------------------------|
| Empirical formula | C <sub>38</sub> H <sub>36</sub> ClN <sub>2</sub> OP <sub>2</sub> Pt |
| Formula weight    | 815.16                                                              |
| Temperature       | 100(2) K                                                            |
| Wavelength        | 0.71073 Å                                                           |
| Crystal system    | Monoclinic                                                          |



|                                              |                                                               |                             |
|----------------------------------------------|---------------------------------------------------------------|-----------------------------|
| Space group                                  | <i>C</i> 2/ <i>c</i>                                          |                             |
| Unit cell dimensions                         | <i>a</i> = 18.0210(14) Å                                      | $\alpha = 90^\circ$ .       |
|                                              | <i>b</i> = 23.0522(17) Å                                      | $\beta = 92.576(3)^\circ$ . |
|                                              | <i>c</i> = 16.6920(13) Å                                      | $\gamma = 90^\circ$ .       |
| Volume                                       | 6927.2(9) Å <sup>3</sup>                                      |                             |
| <i>Z</i>                                     | 8                                                             |                             |
| Density (calculated)                         | 1.563 Mg/m <sup>3</sup>                                       |                             |
| Absorption coefficient                       | 4.251 mm <sup>-1</sup>                                        |                             |
| F(000)                                       | 3232                                                          |                             |
| Crystal size                                 | 0.378 x 0.211 x 0.108 mm <sup>3</sup>                         |                             |
| Theta range for data collection              | 2.443 to 27.610°.                                             |                             |
| Index ranges                                 | -14 ≤ <i>h</i> ≤ 23, -29 ≤ <i>k</i> ≤ 30, -21 ≤ <i>l</i> ≤ 21 |                             |
| Reflections collected                        | 40670                                                         |                             |
| Independent reflections                      | 8011 [R(int) = 0.0308]                                        |                             |
| Completeness to theta = 25.242°              | 99.6 %                                                        |                             |
| Absorption correction                        | Semi-empirical from equivalents                               |                             |
| Max. and min. transmission                   | 0.7457 and 0.6632                                             |                             |
| Refinement method                            | Full-matrix least-squares on F <sup>2</sup>                   |                             |
| Data / restraints / parameters               | 8011 / 99 / 441                                               |                             |
| Goodness-of-fit on F <sup>2</sup>            | 1.056                                                         |                             |
| Final R indices [ <i>I</i> > 2σ( <i>I</i> )] | R1 = 0.0271, wR2 = 0.0720                                     |                             |
| R indices (all data)                         | R1 = 0.0361, wR2 = 0.0767                                     |                             |
| Extinction coefficient                       | n/a                                                           |                             |
| Largest diff. peak and hole                  | 1.099 and -0.565 e.Å <sup>-3</sup>                            |                             |

|  |  |
|--|--|
|  |  |
|--|--|

**Table S3. Important H-bonding for the complexes 1 and 2 are listed**

| Code     | C–H··· $\pi$  | C··· $\pi$ (Å) | H··· $\pi$ (Å) | $\angle$ C–H··· $\pi$ (°) | Symmetry Code           |
|----------|---------------|----------------|----------------|---------------------------|-------------------------|
| <b>1</b> | C2–H2···Cg1   | 3.56           | 2.85           | 133                       | $^{-1/2+x, -1/2-y, z}$  |
|          | C8–H8···Cg2   | 3.48           | 2.64           | 150                       | $^{3/2-x, -1/2+y, 1-z}$ |
| <b>2</b> | C1–H1B···Cg5  | 3.72           | 2.81           | 153                       | $^{1/2-x, 1/2-y, -z}$   |
|          | C9–H9···Cg5   | 3.86           | 2.96           | 159                       | 1-x, 1-y, -z            |
|          | C24–H24···Cg8 | 3.71           | 2.93           | 140                       | x, 1-y, $^{-1/2+z}$     |
|          | C28–H28···Cg3 | 3.33           | 2.92           | 107                       | x, 1-y, $^{1/2+z}$      |
|          | C29–H29···Cg2 | 3.52           | 2.99           | 117                       | x, 1-y, $^{1/2+z}$      |

**Table S4. Calculated excitation wavelength ( $\lambda_{\text{cal}}$ ), oscillator strength (F) and transition energies (E) (TDDFT/B3LYP calculation in DCM solvent) for lowest energy transitions. All the excitations reported here initiate from singlet ground-state.**

| Transition from So state to lowest excited states | $\lambda_{\text{cal}}$ (nm) | E (ev) | F     | Assignments                            |
|---------------------------------------------------|-----------------------------|--------|-------|----------------------------------------|
| S1                                                | 362.6                       | 3.42   | 0.047 | HOMO-1→LUMO 38.8%<br>HOMO→ LUMO 56.2%  |
| T1                                                | 491.1                       | 2.52   | 0.0   | HOMO-1→LUMO 26.3%<br>HOMO→ LUMO 33.64% |

## References

1. APEX2, SADABS and SAINT; Bruker AXS Inc.: Madison, Wisconsin, USA, **2008**.
2. Sheldrick, G. M. *Acta Crystallogr.* **2008**, *A64*, 112–122
3. Dolomanov, O. V.; Bourhis, L. J.; Gildea, R. J.; Howard, J. A. K.; Puschmann, H. *J. Appl. Cryst.* **2009**, *42*, 339–341
4. Nardelli, M. *J. Appl. Crystallogr.* **1995**, *28*, 569.
5. Spek, A. L. *Acta Crystallogr.* **2009**, *D65*, 148–155.
